# Supplementary material for: Phosphoproteome Analysis Using Two-Dimensional Electrophoresis Coupled with Chemical Dephosphorylation
Source: MDPI journal article supplement (doi:10.3390/foods11193119), 2022-10-07
Supplement: s1 [file s1]

Supplementary Material

# **Phosphoproteome Analysis Using Two-Dimensional Electrophoresis Coupled with Chemical Dephosphorylation**

**Raquel Rodríguez-Vázquez \*, Daniel Mouzo and Carlos Zapata**

Supplementary Tables S1–3

Supplementary Figure S1

**Table S1**

Mean volume of *PR* ( $\pm$ SE) and 95% CI interval for 2-DE spots with statistically significant differential phosphorylation rate (*PR*) between HF-P and Pro-Q DPS methods to evaluate phosphorylation from LT muscle meat of Rubia Gallega (RG).

| Spot code <sup>1</sup> | <i>PR</i> <sub>HF-P</sub>    |                                        | <i>PR</i> <sub>ProQ-DPS</sub> |                                        | <i>P</i> -value <sup>4</sup> |
|------------------------|------------------------------|----------------------------------------|-------------------------------|----------------------------------------|------------------------------|
|                        | Volume $\pm$ SE <sup>2</sup> | 95% bootstrap CI (CL, CU) <sup>3</sup> | Volume $\pm$ SE <sup>2</sup>  | 95% bootstrap CI (CL, CU) <sup>3</sup> |                              |
| 1                      | 100 $\pm$ 0.0                | 100, 100                               | 0                             | 0, 0                                   | <0.05                        |
| 2                      | 100 $\pm$ 0.0                | 100, 100                               | 0                             | 0, 0                                   | <0.05                        |
| 3                      | 100 $\pm$ 0.0                | 100, 100                               | 0                             | 0, 0                                   | <0.05                        |
| 4                      | 100 $\pm$ 0.0                | 100, 100                               | 0                             | 0, 0                                   | <0.05                        |
| 5                      | 52 $\pm$ 15.0                | 33.2, 69.9                             | 0                             | 0, 0                                   | <0.05                        |
| 6                      | 47 $\pm$ 13.0                | 22.5, 68.8                             | 0                             | 0, 0                                   | <0.05                        |
| 7                      | 100 $\pm$ 0.0                | 100, 100                               | 0                             | 0, 0                                   | <0.05                        |
| 8                      | 100 $\pm$ 0.0                | 100, 100                               | 0                             | 0, 0                                   | <0.05                        |

|    |               |          |              |            |       |
|----|---------------|----------|--------------|------------|-------|
| 9  | $100 \pm 0.0$ | 100, 100 | 0            | 0, 0       | <0.05 |
| 10 | $100 \pm 0.0$ | 100, 100 | 0            | 0, 0       | <0.05 |
| 11 | $100 \pm 0.0$ | 100, 100 | $13 \pm 3.0$ | 0.07, 0.18 | <0.05 |
| 12 | $100 \pm 0.0$ | 100, 100 | $10 \pm 3.0$ | 5.2, 14.9  | <0.05 |
| 13 | $100 \pm 0.0$ | 100, 100 | 0            | 0, 0       | <0.05 |
| 14 | $100 \pm 0.0$ | 100, 100 | 0            | 0, 0       | <0.05 |
| 15 | $100 \pm 0.0$ | 100, 100 | 0            | 0, 0       | <0.05 |
| 16 | $100 \pm 0.0$ | 100, 100 | 0            | 0, 0       | <0.05 |
| 17 | $100 \pm 0.0$ | 100, 100 | 0            | 0, 0       | <0.05 |
| 18 | $100 \pm 0.0$ | 100, 100 | $71 \pm 10$  | 60.0, 89.6 | <0.05 |
| 19 | $100 \pm 0.0$ | 100, 100 | $48 \pm 15$  | 18.0, 69.0 | <0.05 |
| 20 | $100 \pm 0.0$ | 100, 100 | $51 \pm 12$  | 37.8, 73.0 | <0.05 |
| 21 | $100 \pm 0.0$ | 100, 100 | 0            | 0, 0       | <0.05 |
| 22 | $100 \pm 0.0$ | 100, 100 | 0            | 0, 0       | <0.05 |

|    |               |          |   |      |       |
|----|---------------|----------|---|------|-------|
| 23 | $100 \pm 0.0$ | 100, 100 | 0 | 0, 0 | <0.05 |
| 24 | $100 \pm 0.0$ | 100, 100 | 0 | 0, 0 | <0.05 |
| 25 | $100 \pm 0.0$ | 100, 100 | 0 | 0, 0 | <0.05 |
| 26 | $100 \pm 0.0$ | 100, 100 | 0 | 0, 0 | <0.05 |
| 27 | $100 \pm 0.0$ | 100, 100 | 0 | 0, 0 | <0.05 |
| 28 | $100 \pm 0.0$ | 100, 100 | 0 | 0, 0 | <0.05 |
| 29 | $100 \pm 0.0$ | 100, 100 | 0 | 0, 0 | <0.05 |
| 30 | $100 \pm 0.0$ | 100, 100 | 0 | 0, 0 | <0.05 |
| 31 | $100 \pm 0.0$ | 100, 100 | 0 | 0, 0 | <0.05 |
| 32 | $23 \pm 11.0$ | 15, 38.0 | 0 | 0, 0 | <0.05 |
| 33 | $100 \pm 0.0$ | 100, 100 | 0 | 0, 0 | <0.05 |
| 34 | $100 \pm 0.0$ | 100, 100 | 0 | 0, 0 | <0.05 |
| 35 | $100 \pm 0.0$ | 100, 100 | 0 | 0, 0 | <0.05 |
| 36 | $100 \pm 0.0$ | 100, 100 | 0 | 0, 0 | <0.05 |

|    |               |          |              |            |       |
|----|---------------|----------|--------------|------------|-------|
| 37 | $100 \pm 0.0$ | 100, 100 | 0            | 0, 0       | <0.05 |
| 38 | $100 \pm 0.0$ | 100, 100 | 0            | 0, 0       | <0.05 |
| 39 | $100 \pm 0.0$ | 100, 100 | $69 \pm 5.0$ | 58.0, 76.3 | <0.05 |
| 40 | $100 \pm 0.0$ | 100, 100 | $61 \pm 13$  | 34.2, 77.4 | <0.05 |
| 41 | $100 \pm 0.0$ | 100, 100 | 0            | 0, 0       | <0.05 |
| 42 | $100 \pm 0.0$ | 100, 100 | 0            | 0, 0       | <0.05 |
| 43 | $100 \pm 0.0$ | 100, 100 | $84 \pm 11$  | 61.5, 96.6 | <0.05 |
| 44 | $100 \pm 0.0$ | 100, 100 | $88 \pm 3.0$ | 82.3, 94.3 | <0.05 |
| 45 | $100 \pm 0.0$ | 100, 100 | 0            | 0, 0       | <0.05 |
| 46 | $100 \pm 0.0$ | 100, 100 | 0            | 0, 0       | <0.05 |
| 47 | $100 \pm 0.0$ | 100, 100 | 0            | 0, 0       | <0.05 |
| 48 | $100 \pm 0.0$ | 100, 100 | $72 \pm 15$  | 46.5, 97.6 | <0.05 |
| 49 | $100 \pm 0.0$ | 100, 100 | $86 \pm 4.7$ | 76.5, 91.9 | <0.05 |
| 50 | $100 \pm 0.0$ | 100, 100 | $75 \pm 8.0$ | 58.2, 87.1 | <0.05 |

|    |               |          |              |            |       |
|----|---------------|----------|--------------|------------|-------|
| 51 | $100 \pm 0.0$ | 100, 100 | $66 \pm 21$  | 27.0, 99.6 | <0.05 |
| 52 | $100 \pm 0.0$ | 100, 100 | 0            | 0, 0       | <0.05 |
| 53 | $100 \pm 0.0$ | 100, 100 | 0            | 0, 0       | <0.05 |
| 54 | $100 \pm 0.0$ | 100, 100 | 0            | 0, 0       | <0.05 |
| 55 | $100 \pm 0.0$ | 100, 100 | $80 \pm 7.0$ | 72.7, 92.8 | <0.05 |
| 56 | $100 \pm 0.0$ | 100, 100 | $86 \pm 8.0$ | 72.7, 98.4 | <0.05 |
| 57 | $100 \pm 0.0$ | 100, 100 | 0            | 0, 0       | <0.05 |
| 58 | $100 \pm 0.0$ | 100, 100 | 0            | 0, 0       | <0.05 |
| 59 | $100 \pm 0.0$ | 100, 100 | $21 \pm 9.0$ | 10.3, 39.0 | <0.05 |
| 60 | $100 \pm 0.0$ | 100, 100 | $78 \pm 7.0$ | 70.6, 91.8 | <0.05 |
| 61 | $15 \pm 6.0$  | 3.0, 26  | 0            | 0, 0       | <0.05 |
| 62 | $100 \pm 0.0$ | 100, 100 | 0            | 0, 0       | <0.05 |
| 63 | $100 \pm 0.0$ | 100, 100 | 0            | 0, 0       | <0.05 |
| 64 | $100 \pm 0.0$ | 100, 100 | 0            | 0, 0       | <0.05 |

|    |                 |            |   |      |       |
|----|-----------------|------------|---|------|-------|
| 65 | $100 \pm 0.0$   | 100, 100   | 0 | 0, 0 | <0.05 |
| 66 | $100 \pm 0.0$   | 100, 100   | 0 | 0, 0 | <0.05 |
| 67 | $27 \pm 8.0$    | 12.0, 38.0 | 0 | 0, 0 | <0.05 |
| 68 | $100 \pm 0.0$   | 100, 100   | 0 | 0, 0 | <0.05 |
| 69 | $100 \pm 0.0$   | 100, 100   | 0 | 0, 0 | <0.05 |
| 70 | $45.2 \pm 19.0$ | 23.5, 8    | 0 | 0, 0 | <0.05 |
| 71 | $100 \pm 0.0$   | 100, 100   | 0 | 0, 0 | <0.05 |
| 72 | $100 \pm 0.0$   | 100, 100   | 0 | 0, 0 | <0.05 |
| 73 | $35 \pm 14$     | 19.0, 61.0 | 0 | 0, 0 | <0.05 |
| 74 | $100 \pm 0.0$   | 100, 100   | 0 | 0, 0 | <0.05 |
| 75 | $100 \pm 0.0$   | 100, 100   | 0 | 0, 0 | <0.05 |
| 76 | $100 \pm 0.0$   | 100, 100   | 0 | 0, 0 | <0.05 |
| 77 | $100 \pm 0.0$   | 100, 100   | 0 | 0, 0 | <0.05 |
| 78 | $100 \pm 0.0$   | 100, 100   | 0 | 0, 0 | <0.05 |

|    |                |            |                 |            |       |
|----|----------------|------------|-----------------|------------|-------|
| 79 | $100 \pm 0.0$  | 100, 100   | 0               | 0, 0       | <0.05 |
| 80 | $100 \pm 0.0$  | 100, 100   | $51 \pm 15$     | 24.5, 75.4 | <0.05 |
| 81 | $100 \pm 0.0$  | 100, 100   | $73 \pm 10$     | 42.6, 98.1 | <0.05 |
| 82 | $17 \pm 12$    | 5.2, 40.7  | 0               | 0, 0       | <0.05 |
| 83 | $52 \pm 11$    | 38.6, 64.6 | 0               | 0, 0       | <0.05 |
| 84 | $100 \pm 0.0$  | 100, 100   | 0               | 0, 0       | <0.05 |
| 85 | $100 \pm 0.0$  | 100, 100   | $72 \pm 5$      | 66.8, 81.0 | <0.05 |
| 86 | $100 \pm 0.0$  | 100, 100   | $85 \pm 7$      | 71.4, 94.7 | <0.05 |
| 87 | $100 \pm 0.0$  | 100, 100   | $81 \pm 3$      | 78.0, 87.7 | <0.05 |
| 88 | $9 \pm 2$      | 6, 13      | 0               | 0, 0       | <0.05 |
| 89 | $100 \pm 0.0$  | 100, 100   | 0               | 0, 0       | <0.05 |
| 90 | $100 \pm 0.0$  | 100, 100   | 0               | 0, 0       | <0.05 |
| 91 | $100 \pm 0.0$  | 100, 100   | 0               | 0, 0       | <0.05 |
| 92 | $87.4 \pm 3.7$ | 83.2, 94.2 | $27.2 \pm 16.6$ | 8.9, 59.7  | <0.05 |



|     |                |            |               |          |       |
|-----|----------------|------------|---------------|----------|-------|
| 93  | $47.9 \pm 8.3$ | 38.5, 63.2 | 0             | 0, 0     | <0.05 |
| 94  | $100 \pm 0.0$  | 100, 100   | 0             | 0, 0     | <0.05 |
| 95  | $100 \pm 0.0$  | 100, 100   | 0             | 0, 0     | <0.05 |
| 96  | $53 \pm 18$    | 32.1, 86.2 | 0             | 0, 0     | <0.05 |
| 97  | $100 \pm 0.0$  | 100, 100   | 0             | 0, 0     | <0.05 |
| 98  | $100 \pm 0.0$  | 100, 100   | 0             | 0, 0     | <0.05 |
| 99  | $100 \pm 0.0$  | 100, 100   | 0             | 0, 0     | <0.05 |
| 100 | $100 \pm 0.0$  | 100, 100   | 0             | 0, 0     | <0.05 |
| 101 | $100 \pm 0.0$  | 100, 100   | 0             | 0, 0     | <0.05 |
| 102 | $100 \pm 0.0$  | 100, 100   | 0             | 0, 0     | <0.05 |
| 103 | $100 \pm 0.0$  | 100, 100   | 0             | 0, 0     | <0.05 |
| 104 | $16 \pm 3.0$   | 13.0, 19.0 | 0             | 0, 0     | <0.05 |
| 105 | $59 \pm 2.1$   | 56.5, 62.8 | $100 \pm 0.0$ | 100, 100 | <0.05 |
| 106 | $32.5 \pm 5.0$ | 36.5, 38.5 | $100 \pm 0.0$ | 100, 100 | <0.05 |

|     |                |            |               |            |       |
|-----|----------------|------------|---------------|------------|-------|
| 107 | $22.6 \pm 9.4$ | 4.7, 36.8  | 0             | 0, 0       | <0.05 |
| 108 | $100 \pm 0.0$  | 100, 100   | $51 \pm 13$   | 37.5, 76.1 | <0.05 |
| 109 | $69.6 \pm 5.4$ | 63.3, 79.5 | $100 \pm 0.0$ | 100, 100   | <0.05 |
| 110 | $100 \pm 0.0$  | 100, 100   | $88 \pm 14$   | 47.1, 64.8 | <0.05 |
| 111 | $100 \pm 0.0$  | 100, 100   | 0             | 0, 0       | <0.05 |
| 112 | $100 \pm 0.0$  | 100, 100   | 0             | 0, 0       | <0.05 |
| 113 | $100 \pm 0.0$  | 100, 100   | 0             | 0, 0       | <0.05 |
| 114 | $100 \pm 0.0$  | 100, 100   | 0             | 0, 0       | <0.05 |
| 115 | $88 \pm 3.9$   | 81.4, 94.9 | $5.5 \pm 5.3$ | 0.1,16.0   | <0.05 |
| 116 | $90 \pm 3$     | 84, 95     | 0             | 0, 0       | <0.05 |
| 117 | $100 \pm 0.0$  | 100, 100   | 0             | 0, 0       | <0.05 |
| 118 | $35 \pm 14$    | 30, 39     | 0             | 0, 0       | <0.05 |
| 119 | $100 \pm 0.0$  | 100, 100   | 0             | 0, 0       | <0.05 |
| 120 | $100 \pm 0.0$  | 100, 100   | 0             | 0, 0       | <0.05 |

|     |               |          |   |      |       |
|-----|---------------|----------|---|------|-------|
| 121 | $100 \pm 0.0$ | 100, 100 | 0 | 0, 0 | <0.05 |
| 122 | $100 \pm 0.0$ | 100, 100 | 0 | 0, 0 | <0.05 |
| 1'  | N/A           | --       |   |      | <0.05 |
| 2'  | N/A           | --       |   |      | <0.05 |
| 3'  | N/A           | --       |   |      | <0.05 |
| 4'  | N/A           | --       |   |      | <0.05 |
| 5'  | N/A           | --       |   |      | <0.05 |
| 6'  | N/A           | --       |   |      | <0.05 |
| 7'  | N/A           | --       |   |      | <0.05 |
| 8'  | N/A           | --       |   |      | <0.05 |
| 9'  | N/A           | --       |   |      | <0.05 |
| 10' | N/A           | --       |   |      | <0.05 |
| 11' | N/A           | --       |   |      | <0.05 |

---

---

<sup>1</sup>Gel position of marked spots is shown in Fig. 2.

<sup>2</sup>Mean values and standard error of *PR*.

<sup>3</sup>Non-parametric bootstrap CIs (CL, lower bound; CU, upper bound) determined by the bias corrected percentile method.

<sup>4</sup>Statistically significant differences ( $P < 0.05$ ) in phosphorylation rate between methods.

N/A: More volume in untreated than treated spot with HF-P method

**Table S2**

Phosphorylation rate (*PR*) of each replicate and mean ( $\pm$  SE) for 2-DE spots with statistically significant different *PR* between two methods (HF-P and Pro-Q DPS) to evaluate phosphorylation in meat samples from LT muscle.

| Spot<br>code <sup>1</sup> | <i>PR</i> <sub>HF-P</sub> |                |                |                            | <i>PR</i> <sub>Pro-Q DPS</sub> |                |                |                            |
|---------------------------|---------------------------|----------------|----------------|----------------------------|--------------------------------|----------------|----------------|----------------------------|
|                           | Replicate<br>1            | Replicate<br>2 | Replicate<br>3 | Mean $\pm$ SE <sup>2</sup> | Replicate<br>1                 | Replicate<br>2 | Replicate<br>3 | Mean $\pm$ SE <sup>2</sup> |
| 1                         | 100                       | --             | 100            | 100 $\pm$ 0.0              | 0                              | 0              | 0              | 0.0 $\pm$ 0.0              |
| 2                         | 100                       | 100            | 100            | 100 $\pm$ 0.0              | 0                              | 0              | 0              | 0.0 $\pm$ 0.0              |
| 3                         | --                        | 100            | 100            | 100 $\pm$ 0.0              | 0                              | 0              | 0              | 0.0 $\pm$ 0.0              |
| 4                         | 100                       | 100            | 100            | 100 $\pm$ 0.0              | 0                              | 0              | 0              | 0.0 $\pm$ 0.0              |
| 5                         | 69.9                      | 33.3           | --             | 52.0 $\pm$ 15.0            | 0                              | 0              | 0              | 0.0 $\pm$ 0.0              |
| 6                         | 51.9                      | 22.5           | 66.8           | 47 $\pm$ 13.0              | 0                              | 0              | 0              | 0.0 $\pm$ 0.0              |
| 7                         | 100                       | 100            | 100            | 100 $\pm$ 0.0              | 0                              | 0              | 0              | 0.0 $\pm$ 0.0              |
| 8                         | 100                       | 100            | 100            | 100 $\pm$ 0.0              | 0                              | 0              | 0              | 0.0 $\pm$ 0.0              |
| 9                         | 100                       | 100            | 100            | 100 $\pm$ 0.0              | 0                              | 0              | 0              | 0.0 $\pm$ 0.0              |

|    |     |     |     |               |       |       |       |               |
|----|-----|-----|-----|---------------|-------|-------|-------|---------------|
| 10 | 100 | 100 | 100 | $100 \pm 0.0$ | 0     | 0     | 0     | $0.0 \pm 0.0$ |
| 11 | 100 | 100 | 100 | $100 \pm 0.0$ | 14.56 | 7.02  | 18.38 | $13 \pm 3.0$  |
| 12 | 100 | 100 | 100 | $100 \pm 0.0$ | 14.93 | 5.21  | 10.59 | $10 \pm 3.0$  |
| 13 | 100 | 100 | 100 | $100 \pm 0.0$ | 0     | 0     | 0     | $0.0 \pm 0.0$ |
| 14 | 100 | 100 | 100 | $100 \pm 0.0$ | 0     | 0     | 0     | $0.0 \pm 0.0$ |
| 15 | 100 | 100 | 100 | $100 \pm 0.0$ | 0     | 0     | 0     | $0.0 \pm 0.0$ |
| 16 | 100 | 100 | 100 | $100 \pm 0.0$ | 0     | 0     | 0     | $0.0 \pm 0.0$ |
| 17 | 100 | 100 | 100 | $100 \pm 0.0$ | 0     | 0     | 0     | $0.0 \pm 0.0$ |
| 18 | 100 | 100 | 100 | $100 \pm 0.0$ | 57.44 | 65.11 | 89.63 | $71 \pm 10$   |
| 19 | 100 | 100 | 100 | $100 \pm 0.0$ | 17.98 | 69.04 | 57.49 | $48 \pm 15$   |
| 20 | 100 | 100 | 100 | $100 \pm 0.0$ | 47.09 | 33.18 | 73.03 | $51 \pm 12$   |
| 21 | 100 | 100 | 100 | $100 \pm 0.0$ | 0     | 0     | 0     | $0.0 \pm 0.0$ |
| 22 | 100 | 100 | 100 | $100 \pm 0.0$ | 0     | 0     | 0     | $0.0 \pm 0.0$ |
| 23 | 100 | 100 | 100 | $100 \pm 0.0$ | 0     | 0     | 0     | $0.0 \pm 0.0$ |
| 24 | 100 | 100 | 100 | $100 \pm 0.0$ | 0     | 0     | 0     | $0.0 \pm 0.0$ |

|    |      |     |      |               |       |       |       |               |
|----|------|-----|------|---------------|-------|-------|-------|---------------|
| 25 | 100  | 100 | 100  | $100 \pm 0.0$ | 0     | 0     | 0     | $0.0 \pm 0.0$ |
| 26 | 100  | 100 | 100  | $100 \pm 0.0$ | 0     | 0     | 0     | $0.0 \pm 0.0$ |
| 27 | 100  | 100 | 100  | $100 \pm 0.0$ | 0     | 0     | 0     | $0.0 \pm 0.0$ |
| 28 | 100  | 100 | 100  | $100 \pm 0.0$ | 0     | 0     | 0     | $0.0 \pm 0.0$ |
| 29 | 100  | 100 | 100  | $100 \pm 0.0$ | 0     | 0     | 0     | $0.0 \pm 0.0$ |
| 30 | 100  | 100 | 100  | $100 \pm 0.0$ | 0     | 0     | 0     | $0.0 \pm 0.0$ |
| 31 | 100  | 100 | 100  | $100 \pm 0.0$ | 0     | 0     | 0     | $0.0 \pm 0.0$ |
| 32 | 38.3 | 1.5 | 29.3 | $23 \pm 11.0$ | 0     | 0     | 0     | $0.0 \pm 0.0$ |
| 33 | 100  | 100 | 100  | $100 \pm 0.0$ | 0     | 0     | 0     | $0.0 \pm 0.0$ |
| 34 | 100  | 100 | 100  | $100 \pm 0.0$ | 0     | 0     | 0     | $0.0 \pm 0.0$ |
| 35 | 100  | 100 | 100  | $100 \pm 0.0$ | 0     | 0     | 0     | $0.0 \pm 0.0$ |
| 36 | 100  | 100 | 100  | $100 \pm 0.0$ | 0     | 0     | 0     | $0.0 \pm 0.0$ |
| 37 | 100  | 100 | 100  | $100 \pm 0.0$ | 0     | 0     | 0     | $0.0 \pm 0.0$ |
| 38 | 100  | 100 | 100  | $100 \pm 0.0$ | 0     | 0     | 0     | $0.0 \pm 0.0$ |
| 39 | 100  | 100 | 100  | $100 \pm 0.0$ | 76.29 | 58.03 | 72.04 | $69 \pm 5.0$  |

|    |     |     |     |               |       |       |       |               |
|----|-----|-----|-----|---------------|-------|-------|-------|---------------|
| 40 | 100 | 100 | 100 | $100 \pm 0.0$ | 34.19 | 77.43 | 70.54 | $61 \pm 13$   |
| 41 | 100 | 100 | 100 | $100 \pm 0.0$ | 0     | 0     | 0     | $0.0 \pm 0.0$ |
| 42 | 100 | 100 | 100 | $100 \pm 0.0$ | 0     | 0     | 0     | $0.0 \pm 0.0$ |
| 43 | 100 | 100 | 100 | $100 \pm 0.0$ | 96.63 | 61.54 | 91.41 | $84 \pm 11$   |
| 44 | 100 | 100 | 100 | $100 \pm 0.0$ | 94.33 | 82.33 | 89.10 | $88 \pm 3.0$  |
| 45 | 100 | 100 | 100 | $100 \pm 0.0$ | 0     | 0     | 0     | $0.0 \pm 0.0$ |
| 46 | 100 | 100 | 100 | $100 \pm 0.0$ | 0     | 0     | 0     | $0.0 \pm 0.0$ |
| 47 | 100 | 100 | 100 | $100 \pm 0.0$ | 0     | 0     | 0     | $0.0 \pm 0.0$ |
| 48 | 100 | 100 | 100 | $100 \pm 0.0$ | 46.52 | 73.14 | 97.58 | $72 \pm 15$   |
| 49 | 100 | 100 | 100 | $100 \pm 0.0$ | 89.07 | 76.55 | 91.90 | $86 \pm 5.0$  |
| 50 | 100 | 100 | 100 | $100 \pm 0.0$ | 87.13 | 80.49 | 58.17 | $75 \pm 8.0$  |
| 51 | 100 | 100 | 100 | $100 \pm 0.0$ | 99.65 | 26.97 | 71.92 | $66 \pm 21$   |
| 52 | 100 | 100 | 100 | $100 \pm 0.0$ | 0     | 0     | 0     | $0.0 \pm 0.0$ |
| 53 | 100 | 100 | 100 | $100 \pm 0.0$ | 0     | 0     | 0     | $0.0 \pm 0.0$ |
| 54 | 100 | 100 | 100 | $100 \pm 0.0$ | 0     | 0     | 0     | $0.0 \pm 0.0$ |



|    |      |      |      |               |       |       |       |               |
|----|------|------|------|---------------|-------|-------|-------|---------------|
| 55 | 100  | 100  | 100  | $100 \pm 0.0$ | 92.80 | 75.21 | 71.59 | $80 \pm 7.0$  |
| 56 | 100  | 100  | 100  | $100 \pm 0.0$ | 89.0  | 72.0  | 98.0  | $86 \pm 8.0$  |
| 57 | 100  | 100  | 100  | $100 \pm 0.0$ | 0     | 0     | 0     | $0.0 \pm 0.0$ |
| 58 | 100  | 100  | 100  | $100 \pm 0.0$ | 0     | 0     | 0     | $0.0 \pm 0.0$ |
| 59 | 100  | 100  | 100  | $100 \pm 0.0$ | 7.36  | 39.2  | 16.18 | $21 \pm 9.0$  |
| 60 | 100  | 100  | 100  | $100 \pm 0.0$ | 91.83 | 71.18 | 70.29 | $78 \pm 7.0$  |
| 61 | 26.2 | 3.4  | 15.2 | $15 \pm 6.0$  | 0     | 0     | 0     | $0.0 \pm 0.0$ |
| 62 | 100  | 100  | 100  | $100 \pm 0.0$ | 0     | 0     | 0     | $0.0 \pm 0.0$ |
| 63 | 100  | 100  | 100  | $100 \pm 0.0$ | 0     | 0     | 0     | $0.0 \pm 0.0$ |
| 64 | 100  | 100  | 100  | $100 \pm 0.0$ | 0     | 0     | 0     | $0.0 \pm 0.0$ |
| 65 | 100  | 100  | 100  | $100 \pm 0.0$ | 0     | 0     | 0     | $0.0 \pm 0.0$ |
| 66 | 100  | 100  | 100  | $100 \pm 0.0$ | 0     | 0     | 0     | $0.0 \pm 0.0$ |
| 67 | 12.2 | 31.7 | 38.0 | $27 \pm 8.0$  | 0     | 0     | 0     | $0.0 \pm 0.0$ |
| 68 | 100  | 100  | 100  | $100 \pm 0.0$ | 0     | 0     | 0     | $0.0 \pm 0.0$ |
| 69 | 100  | 100  | 100  | $100 \pm 0.0$ | 0     | 0     | 0     | $0.0 \pm 0.0$ |

|    |      |      |      |                 |       |       |       |               |
|----|------|------|------|-----------------|-------|-------|-------|---------------|
| 70 | 14.4 | 41.6 | 79.8 | $45.2 \pm 19.0$ | 0     | 0     | 0     | $0.0 \pm 0.0$ |
| 71 | 100  | 100  | --   | $100 \pm 0.0$   | 0     | 0     | --    | $0.0 \pm 0.0$ |
| 72 | 100  | 100  | 100  | $100 \pm 0.0$   | 0     | 0     | 0     | $0.0 \pm 0.0$ |
| 73 | 12.0 | 33.5 | 60.7 | $35 \pm 14$     | 0     | 0     | 0     | $0.0 \pm 0.0$ |
| 74 | 100  | 100  | 100  | $100 \pm 0.0$   | 0     | 0     | 0     | $0.0 \pm 0.0$ |
| 75 | 100  | 100  | --   | $100 \pm 0.0$   | 0     | 0     | --    | $0.0 \pm 0.0$ |
| 76 | 100  | 100  | 100  | $100 \pm 0.0$   | 0     | 0     | 0     | $0.0 \pm 0.0$ |
| 77 | 100  | 100  | 100  | $100 \pm 0.0$   | 0     | 0     | 0     | $0.0 \pm 0.0$ |
| 78 | 100  | 100  | 100  | $100 \pm 0.0$   | 0     | 0     | 0     | $0.0 \pm 0.0$ |
| 79 | 100  | 100  | 100  | $100 \pm 0.0$   | 0     | 0     | 0     | $0.0 \pm 0.0$ |
| 80 | 100  | 100  | 100  | $100 \pm 0.0$   | 24.56 | 53.10 | 75.39 | $51 \pm 15$   |
| 81 | 100  | 100  | --   | $100 \pm 0.0$   | 42.59 | 79.20 | 98.13 | $73 \pm 16$   |
| 82 | 5.2  | 5.2  | 40.7 | $17 \pm 12$     | 0     | 0     | 0     | $0.0 \pm 0.0$ |
| 83 | 38.6 | --   | 64.7 | $52 \pm 11$     | 0     | --    | 0     | $0.0 \pm 0.0$ |
| 84 | 100  | 100  | --   | $100 \pm 0.0$   | 0     | 0     | --    | $0.0 \pm 0.0$ |

|    |      |      |      |                |       |       |       |                 |
|----|------|------|------|----------------|-------|-------|-------|-----------------|
| 85 | 100  | 100  | 100  | $100 \pm 0.0$  | 69.89 | 65.28 | 80.98 | $72 \pm 5$      |
| 86 | 100  | 100  | 100  | $100 \pm 0.0$  | 71.38 | 90.06 | 94.67 | $85 \pm 7$      |
| 87 | 100  | 100  | 100  | $100 \pm 0.0$  | 77.02 | 87.67 | 79.97 | $81 \pm 3$      |
| 88 | 13.4 | 7.6  | 5.3  | $9 \pm 2$      | 0     | 0     | 0     | $0.0 \pm 0.0$   |
| 89 | 100  | --   | 100  | $100 \pm 0.0$  | 0     | --    | 0     | $0.0 \pm 0.0$   |
| 90 | 100  | 100  | 100  | $100 \pm 0.0$  | 0     | 0     | 0     | $0.0 \pm 0.0$   |
| 91 | 100  | 100  | 100  | $100 \pm 0.0$  | 0     | 0     | 0     | $0.0 \pm 0.0$   |
| 92 | 81.5 | 94.2 | 86.6 | $87.4 \pm 3.7$ | 4.99  | 16.85 | 59.74 | $27.2 \pm 16.6$ |
| 93 | 34.8 | 45.8 | 63.3 | $47.9 \pm 8.3$ | 0     | 0     | 0     | $0.0 \pm 0.0$   |
| 94 | 100  | 100  | 100  | $100 \pm 0.0$  | 0     | 0     | 0     | $0.0 \pm 0.0$   |
| 95 | 100  | 100  | 100  | $100 \pm 0.0$  | 0     | 0     | 0     | $0.0 \pm 0.0$   |
| 96 | 24.1 | 48.0 | 86.2 | $53 \pm 18$    | 0     | 0     | 0     | $0.0 \pm 0.0$   |
| 97 | 100  | --   | 100  | $100 \pm 0.0$  | 0     | --    | 0     | $0.0 \pm 0.0$   |
| 98 | 100  | 100  | 100  | $100 \pm 0.0$  | 0     | 0     | 0     | $0.0 \pm 0.0$   |
| 99 | 100  | 100  | 100  | $100 \pm 0.0$  | 0     | 0     | 0     | $0.0 \pm 0.0$   |

|     |      |      |      |                |       |       |       |               |
|-----|------|------|------|----------------|-------|-------|-------|---------------|
| 100 | 100  | 100  | 100  | $100 \pm 0.0$  | 0     | 0     | 0     | $0.0 \pm 0.0$ |
| 101 | 100  | 100  | 100  | $100 \pm 0.0$  | 0     | 0     | 0     | $0.0 \pm 0.0$ |
| 102 | --   | 100  | 100  | $100 \pm 0.0$  | --    | 0     | 0     | $0.0 \pm 0.0$ |
| 103 | 100  | 100  | 100  | $100 \pm 0.0$  | 0     | 0     | 0     | $0.0 \pm 0.0$ |
| 104 | --   | 19.4 | 13.0 | $16 \pm 3.0$   | --    | 0     | 0     | $0.0 \pm 0.0$ |
| 105 | 63.0 | 58.8 | 55.5 | $59 \pm 2.1$   | 100   | 100   | 100   | $100 \pm 0.0$ |
| 106 | 38.5 | 22.5 | 36.5 | $32.5 \pm 5.0$ | 100   | 100   | 100   | $100 \pm 0.0$ |
| 107 | 4.7  | 36.8 | 26.6 | $22.6 \pm 9.4$ | 0     | 0     | 0     | $0.0 \pm 0.0$ |
| 108 | 100  | 100  | 100  | $100 \pm 0.0$  | 34.93 | 76.15 | 42.67 | $51 \pm 13$   |
| 109 | 60.8 | 68.5 | 79.5 | $69.6 \pm 5.4$ | 100   | 100   | 100   | $100 \pm 0.0$ |
| 110 | 100  | --   | 100  | $100 \pm 0.0$  | 100   | --    | 70.38 | $88 \pm 14$   |
| 111 | 100  | 100  | 100  | $100 \pm 0.0$  | 0     | 0     | 0     | $0.0 \pm 0.0$ |
| 112 | --   | 100  | 100  | $100 \pm 0.0$  | --    | 0     | 0     | $0.0 \pm 0.0$ |
| 113 | 100  | 100  | 100  | $100 \pm 0.0$  | 0     | 0     | 0     | $0.0 \pm 0.0$ |
| 114 | 100  | 100  | 100  | $100 \pm 0.0$  | 0     | 0     | 0     | $0.0 \pm 0.0$ |

|     |       |       |       |               |    |       |      |               |
|-----|-------|-------|-------|---------------|----|-------|------|---------------|
| 115 | 94.91 | 81.38 | 90.06 | $88 \pm 3.9$  | 0  | 16.03 | 0.42 | $5.5 \pm 5.3$ |
| 116 | 94.9  | 83.9  | 90.0  | $90 \pm 3$    | 0  | 0     | 0    | $0.0 \pm 0.0$ |
| 117 | 100   | 100   | 100   | $100 \pm 0.0$ | 0  | 0     | 0    | $0.0 \pm 0.0$ |
| 118 | --    | 30.0  | 39.2  | $35 \pm 14$   | -- | 0     | 0    | $0.0 \pm 0.0$ |
| 119 | 100   | 100   | 100   | $100 \pm 0.0$ | 0  | 0     | 0    | $0.0 \pm 0.0$ |
| 120 | 100   | 100   | 100   | $100 \pm 0.0$ | 0  | 0     | 0    | $0.0 \pm 0.0$ |
| 121 | 100   | 100   | 100   | $100 \pm 0.0$ | 0  | 0     | 0    | $0.0 \pm 0.0$ |
| 122 | 100   | 100   | 100   | $100 \pm 0.0$ | 0  | 0     | 0    | $0.0 \pm 0.0$ |
| 1'  | N/A   | N/A   | N/A   |               |    |       |      |               |
| 2'  | N/A   | N/A   | N/A   |               |    |       |      |               |
| 3'  | N/A   | N/A   | N/A   |               |    |       |      |               |
| 4'  | N/A   | N/A   | N/A   |               |    |       |      |               |
| 5'  | N/A   | N/A   | N/A   |               |    |       |      |               |
| 6'  | N/A   | N/A   | N/A   |               |    |       |      |               |
| 7'  | N/A   | N/A   | N/A   |               |    |       |      |               |

|     |     |     |     |
|-----|-----|-----|-----|
| 8'  | N/A | N/A | N/A |
| 9'  | N/A | N/A | N/A |
| 10' | N/A | N/A | N/A |
| 11' | N/A | N/A | N/A |

---

<sup>1</sup> Gel positions of marked spots is shown in Figure 2

<sup>2</sup>Mean values and standard error of *PR*.

N/A: More volume in untreated than treated spot with HF-P method

**Table S3**

Volume of spots for untreated protein samples, dephosphorylated spots with HF-P and phosphorylated spots visualized with Pro-Q DPS were assessed by PDQuest software.

| Spot<br>code <sup>1</sup> | Volume/Total protein <sup>2</sup> |        |        |                 | Volume/ HF-P treatment <sup>2</sup> |        |        |                 | Volume/ Pro-Q DPS <sup>2</sup> |        |        |                 |
|---------------------------|-----------------------------------|--------|--------|-----------------|-------------------------------------|--------|--------|-----------------|--------------------------------|--------|--------|-----------------|
|                           | Repl 1                            | Repl 2 | Repl 3 | Mean ±          | Repl 1                              | Repl 2 | Repl 3 | Mean ±          | Repl 1                         | Repl 2 | Repl 3 | Mean ±          |
|                           |                                   |        |        | SE <sup>3</sup> |                                     |        |        | SE <sup>3</sup> |                                |        |        | SE <sup>3</sup> |
| 1A                        | 3561                              | 1387   | 2737   | 2562 ± 634      | 0                                   | 0      | 0      | 0 ± 0           | 0                              | 0      | 0      | 0 ± 0           |
| 2A                        | 12396                             | 7724.2 | 19575  | 13232 ±<br>3446 | 2295                                | 446    | 2616   | 1786 ± 676      | 619                            | 1301   | 11694  | 4538 ±<br>3583  |
| 3A                        | 9611                              | 14224  | 18967  | 14267 ±<br>2701 | 6266                                | 7706   | 6966   | 6979 ± 416      | 0                              | 0      | 0      | 0 ± 0           |
| 4A                        | 1136                              | 8001   | --     | 4568 ± 2803     | 0                                   | 0      | 0      | 0 ± 0           | 0                              | 0      | 0      | 0 ± 0           |
| 5A                        | 2130                              | 2393   | 1451   | 1991 ± 281      | 5584                                | 7758   | 4382   | 5908 ± 988      | 0                              | 0      | 0      | 0 ± 0           |

|    |       |       |       |                 |      |      |      |            |       |       |       |                 |
|----|-------|-------|-------|-----------------|------|------|------|------------|-------|-------|-------|-----------------|
| 1B | 6284  | 3904  | 5587  | 5258 ± 706      | 2337 | 1607 | 2487 | 2144 ± 272 | 14700 | 9875  | 10748 | 11774 ±<br>1484 |
| 2B | 7564  | 5482  | 9379  | 7475 ± 1126     | 4651 | 4247 | 5955 | 4951 ± 515 | 14352 | 9697  | 9554  | 11201 ±<br>1576 |
| 3B | 2653  | 3816  | 4182  | 3550 ± 461      | 2529 | 2413 | 3070 | 2671 ± 202 | 0     | 0     | 0     | 0 ± 0           |
| 4B | 23123 | 17493 | 10743 | 17120 ±<br>3579 | 0    | 0    | 0    | 0 ± 0      | 37437 | 48448 | 48497 | 44794 ±<br>3678 |
| 5B | 18864 | 20171 | 29351 | 22795 ±<br>3299 | 7401 | 6360 | 6008 | 6590 ± 418 | 63043 | 50724 | 66758 | 60175 ±<br>4845 |
| 6B | 2089  | 4847  | 18832 | 8589 ± 5183     | 4234 | 3029 | 1905 | 3056 ± 672 | 705   | 4232  | 6496  | 3811 ±<br>1685  |
| 7B | --    | --    | --    | --              | 3429 | 4671 | 3380 | 3826 ± 422 | --    | --    | --    | --              |
| 1C | 1657  | 1275  | 4330  | 2421 ± 961      | 0    | 0    | 0    | 0 ± 0      | 0     | 0     | 0     | 0 ± 0           |
| 2C | 2962  | 7239  | 7749  | 5983 ± 1518     | 0    | 0    | 0    | 0 ± 0      | 0     | 0     | 0     | 0 ± 0           |



|    |       |       |       |                 |     |      |      |            |   |      |    |              |
|----|-------|-------|-------|-----------------|-----|------|------|------------|---|------|----|--------------|
| 3C | 12496 | 15407 | 11677 | 13193 ±<br>1132 | 636 | 2868 | 1161 | 1555 ± 674 | 0 | 2469 | 49 | 839 ±<br>814 |
|----|-------|-------|-------|-----------------|-----|------|------|------------|---|------|----|--------------|

---

<sup>1</sup> Gel positions of marked spots is shown in Figure 4.

<sup>2</sup> Volume of each biological replicate.

<sup>3</sup> Mean (± SE) volumes from replicates of *PR*

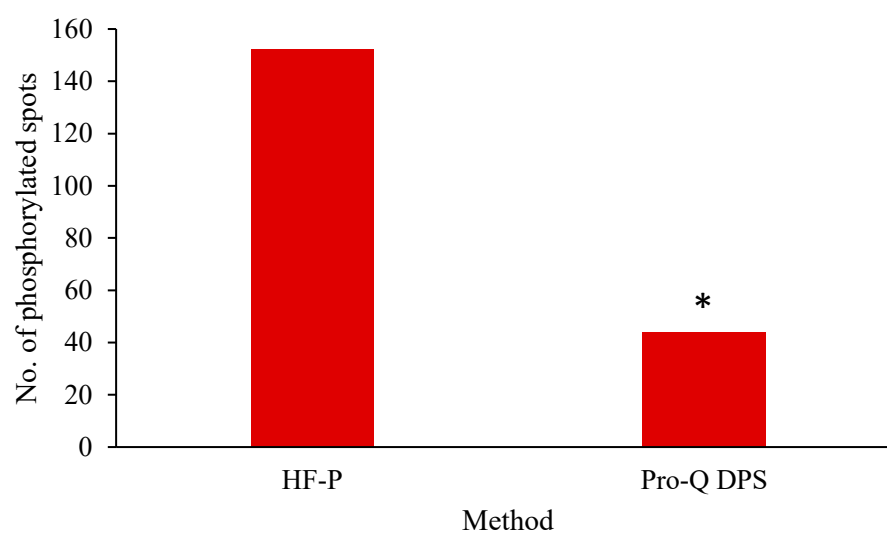

**Figure S1.** Number of phosphorylated protein spots obtained with HF-P and Pro-Q DPS method (\* $P < 0.0001$ , Fisher's exact test).
